# Supplementary material
Source: Springer Nature journal article supplement (https://www.springermedizin.de/resource/supplementary/13229_2013_114_MOESM6_ESM.pdf/9676192)

# Chromosome 20

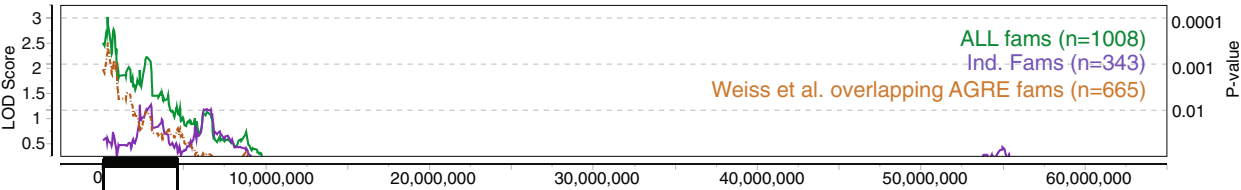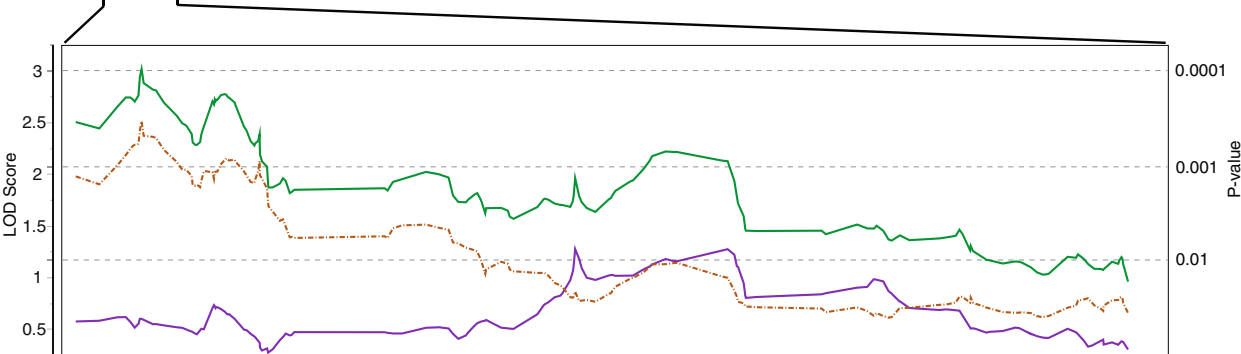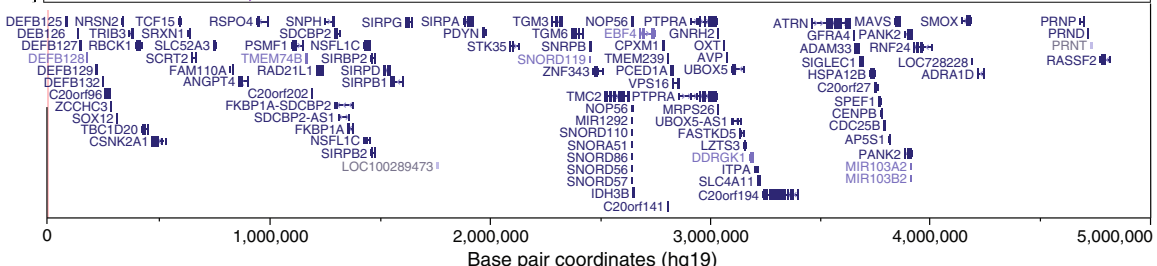

Supplement: MOESM6 [file 9676192]
